# Supplementary material for: Isoliquiritigenin attenuates the invasive capacity of breast cancer cells via up-regulating the tumor suppressor RECK
Source: Royal Society of Chemistry journal article supplement (doi:10.1039/c5ra26759e), 2016-01-01

---

### Supplementary data

**Figure S1.** (A) The breast cancer cell lines MDA-MB-231 and Hs-578T were transiently transfected with control or RECK siRNA for 12h. RECK mRNA was analyzed by qRT-PCR (mean  $\pm$  SD, n=3) analysis. \*\*  $P < 0.01$  compared with si-con transfected MDA-MB-231 cells and ##  $P < 0.01$  compared with si-con transfected Hs-578T cells. (B) The breast cancer cell lines MDA-MB-231 and Hs-578T were transiently transfected with si-con or RECK siRNA for 12h, then exposed to 0.0 or 10.0  $\mu$ M of ISL for 24h. RECK mRNA was analyzed by qRT-PCR (mean  $\pm$  SD, n=3) analysis. \*\*  $P < 0.01$  compared with si-con transfected MDA-MB-231 cells treated with 10.0  $\mu$ M of ISL and ##  $P < 0.01$  compared with si-con transfected Hs-578T cells treated with 10.0  $\mu$ M of ISL. (C) Breast cancer cell lines Hs-578T and MDA-MB-231 cells were transiently transfected with anti-con or anti-miR-21 for 12h. Relative expression level of miR-21 was determined by qRT-PCR (Fold, mean  $\pm$  SD, n=3). \*\*  $P < 0.01$  compared with anti-con transfected MDA-MB-231 cells and ##  $P < 0.01$  compared with anti-con transfected Hs-578T cells. (D) MDA-MB-231 and Hs-578T cells were transiently transfected with mimic-con or mimic-miR-21 for 12h, then exposed to 10.0  $\mu$ M of ISL for 24h. Relative expression level of miR-21 was determined by qRT-PCR (Fold, mean  $\pm$  SD, n=3). \*\*  $P < 0.01$  compared with mimic-con transfected cells and ##  $P < 0.01$  compared with mimic-con-transfected cells treated with 10.0  $\mu$ M of ISL.

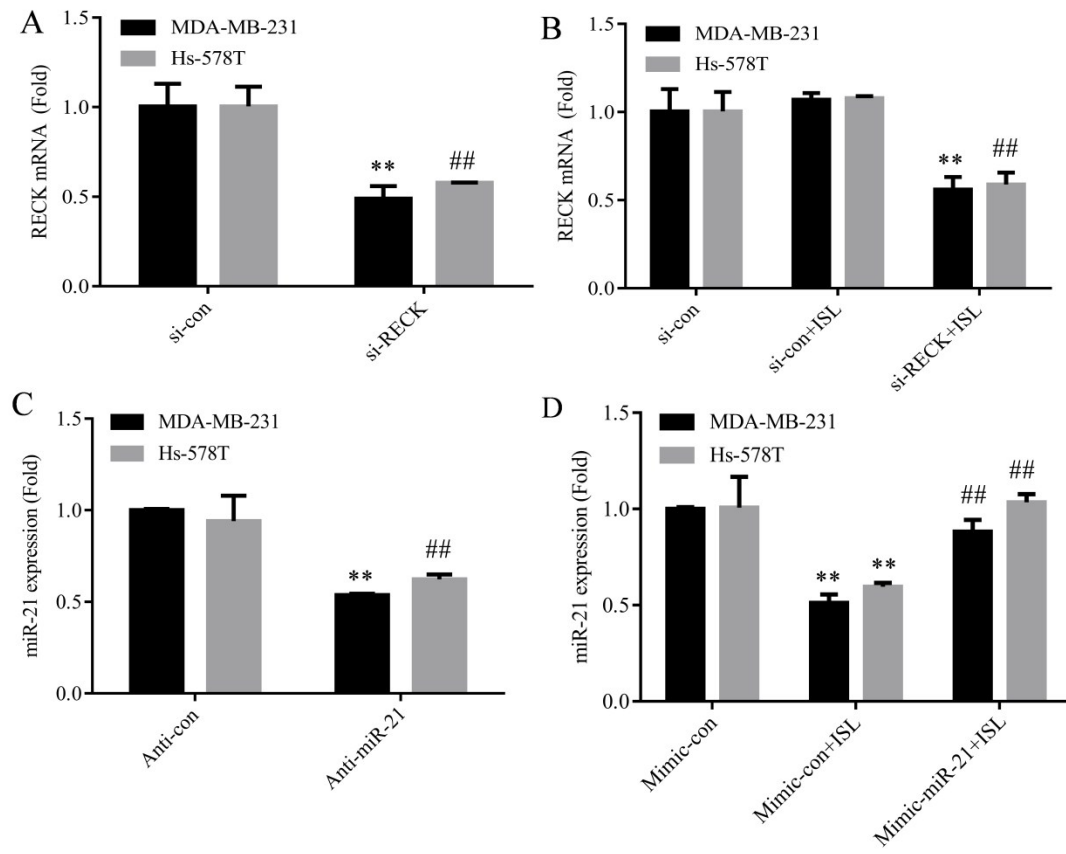

Supplement: c5ra26759e1.pdf [file c5ra26759e1.pdf]
